# Supplementary material for: A prototype continuous-flow liquid–liquid extraction system using open-source technology
Source: Royal Society of Chemistry journal article supplement (doi:10.1039/c2ob25912e), 2012-01-01
Supplement: c2ob25912e.pdf [file c2ob25912e.pdf]

# A prototype continuous-flow liquid-liquid extraction system using open-source technology.

## SUPPORTING INFORMATION

**Matthew O'Brien,\* Peter Koos, Duncan L. Browne and Steven V. Ley**

*Department of Chemistry, University of Cambridge, Lensfield Road, Cambridge CB2 1EW*

|                                                   |     |
|---------------------------------------------------|-----|
| Overall setup                                     | S2  |
| Prototype separator                               | S3  |
| Inline mixer                                      | S4  |
| Intensity/Concentration Calibration Curves        | S6  |
| Comparison between linear and quartic calibration | S7  |
| <br>                                              |     |
| Data for <b>3a</b>                                | S8  |
| Data for <b>3b</b>                                | S8  |
| Data for <b>3c</b>                                | S8  |
| Data for <b>3d</b>                                | S8  |
| Data for <b>3e</b>                                | S9  |
| Data for <b>3f</b>                                | S9  |
| Data for <b>3g</b>                                | S9  |
| Data for <b>3h</b>                                | S9  |
| Data for <b>3i</b>                                | S10 |
| <br>                                              |     |
| Data for <b>6a</b>                                | S10 |
| Data for <b>6b</b>                                | S10 |
| Data for <b>6c</b>                                | S10 |
| Data for <b>6d</b>                                | S11 |
| <br>                                              |     |
| Data for <b>9a</b>                                | S11 |
| Data for <b>9b</b>                                | S11 |
| Data for <b>9c</b>                                | S11 |

## General Experimental (Flow Apparatus) Overall setup

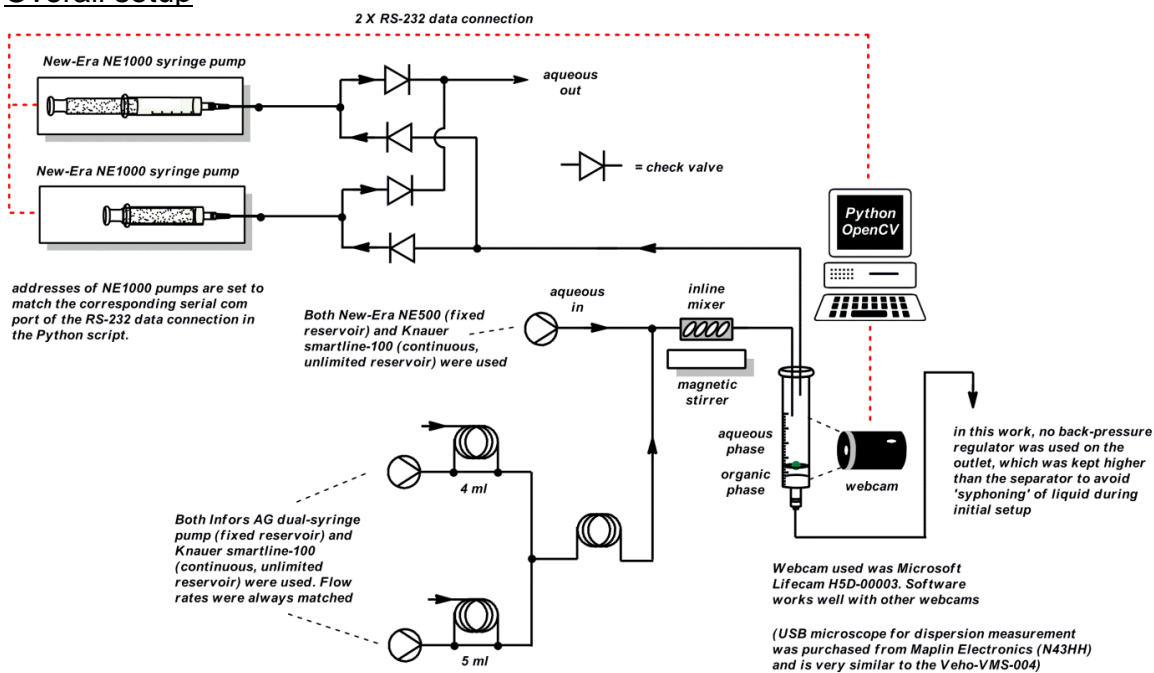

### Prototype Separator

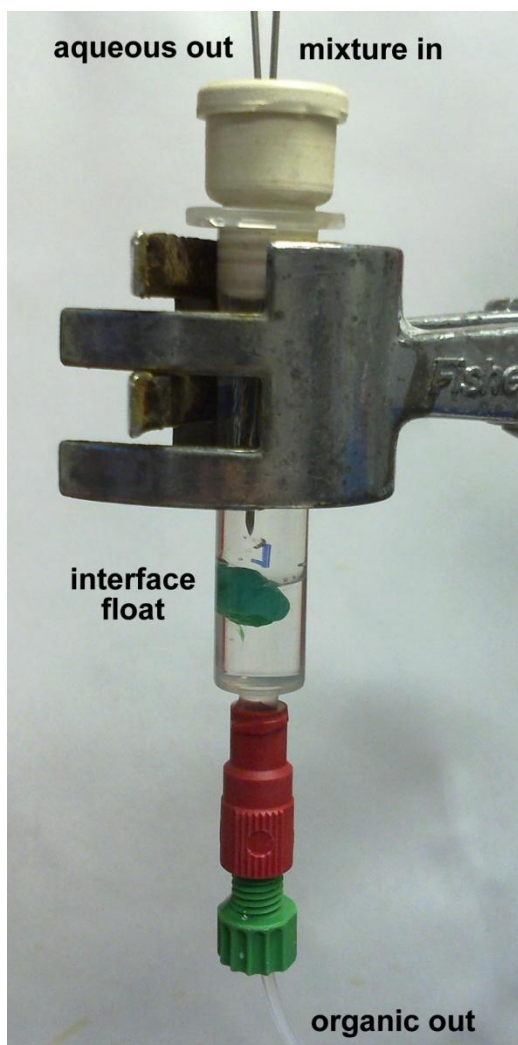

The main body is a 2.5 mL plastic syringe barrel. Upper inlets are 120 mm stainless steel 21g needles going through the B10 suba-seal. The interface float was made by melting together roughly equal amounts (volume) of the polyethylene plunger from an HSW normject 1 mL syringe and a peice of green B-24 Keck clip.

### Inline Mixer

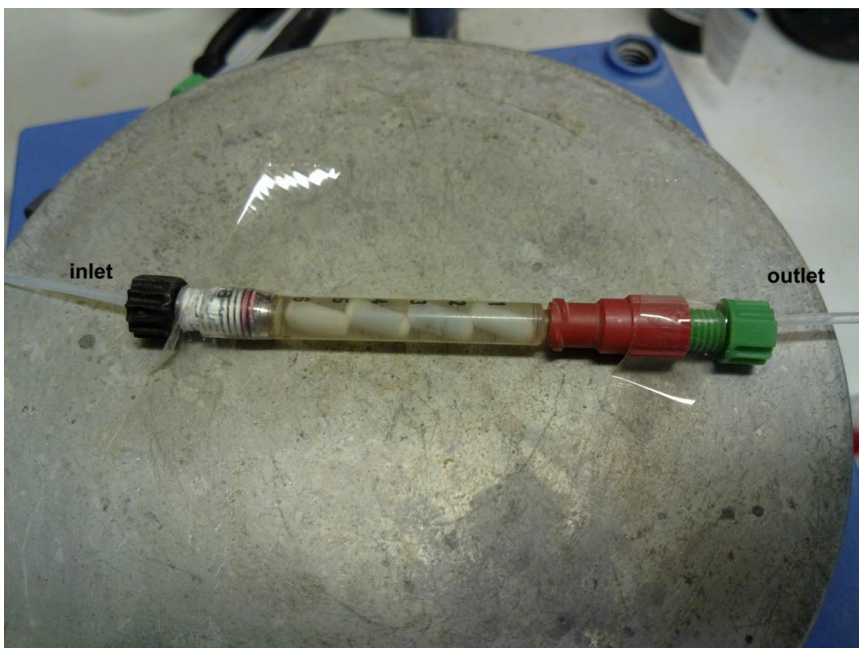

Body of mixer is cut from the barrel of a 1 mL HSW normject syringe. The thread on the inlet side was made by heating to softness then screwing in the 1/4-28-UNF connector, which cut a thread. PTFE tape was used to improve the seal. The outlet is a simple female luer to female 1/4-28 UNF adapter.

Inline mixer, biphasic mixture (DCM/Water, DCM dyed red), stirrer on maximum speed:

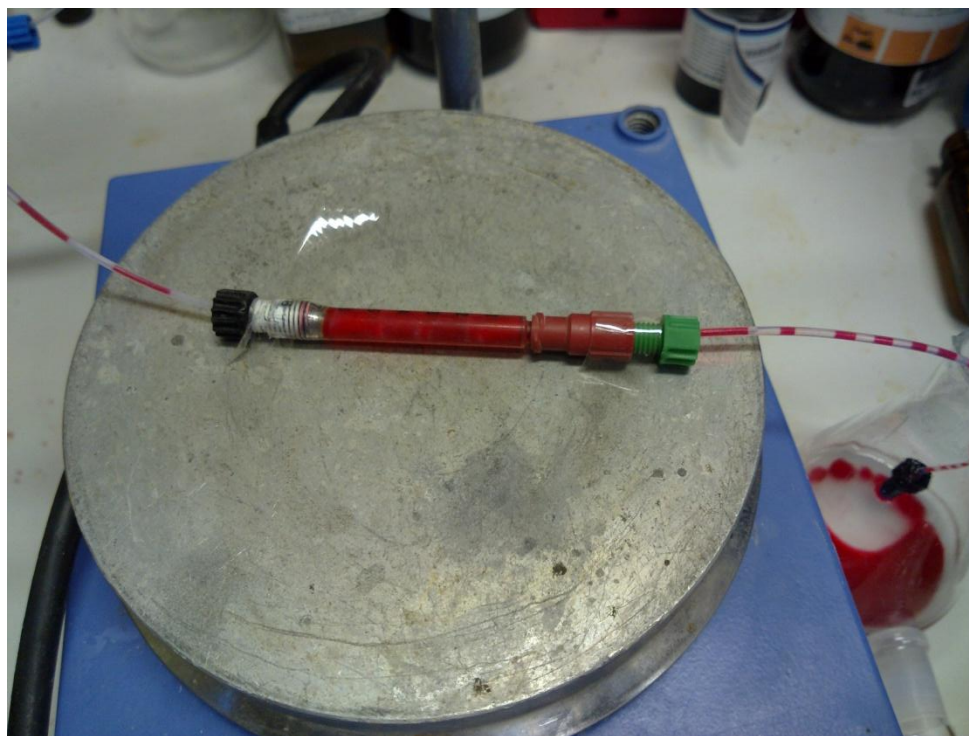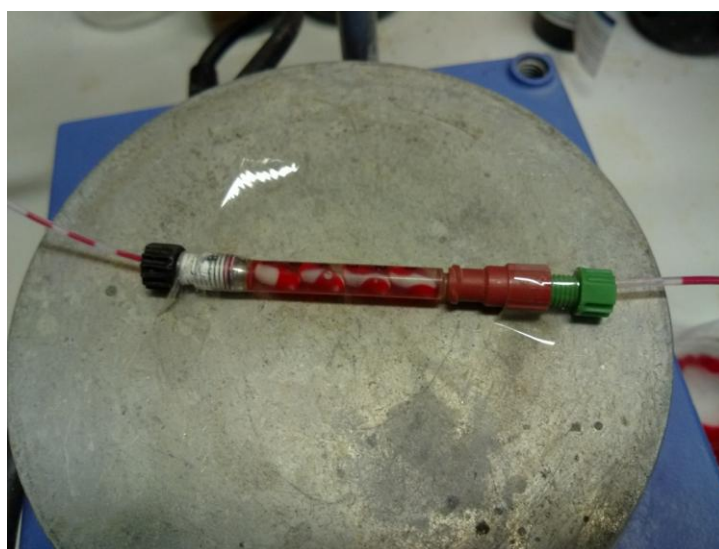

Inline mixer, biphasic mixture, no stirring

Linear Regression between dye concentration and red intensity:

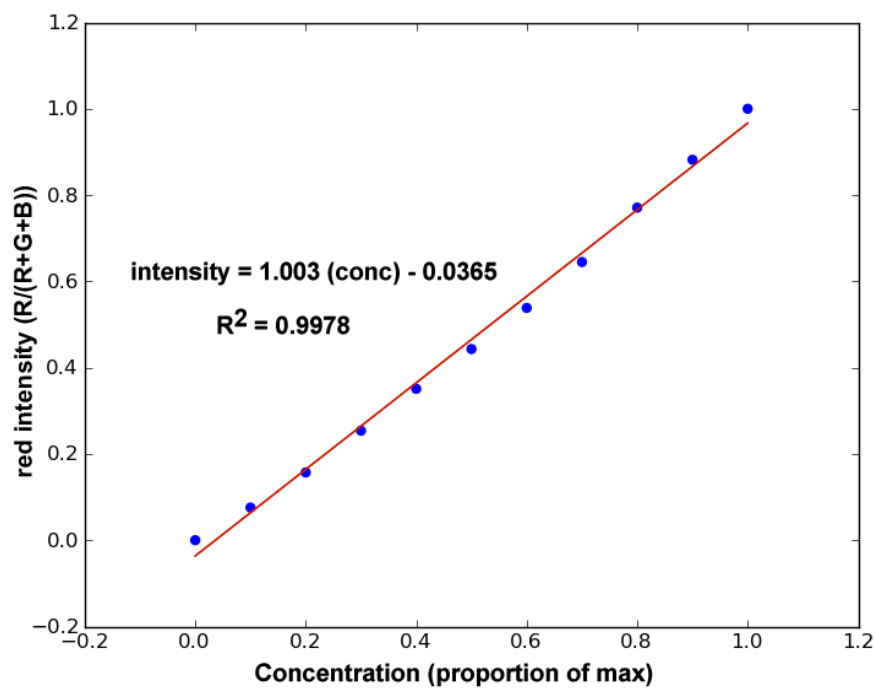

Quartic polynomial calibration:

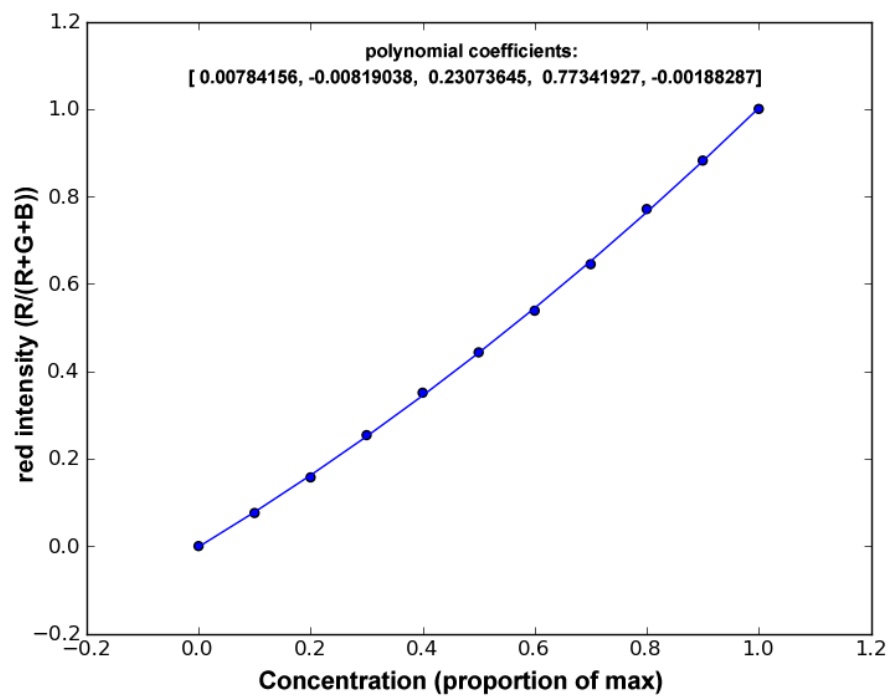

Comparison between linear and quartic calibration (converting calculated concentration to 'observed' intensity) for 0.25 mL heavy phase dispersion measurements.

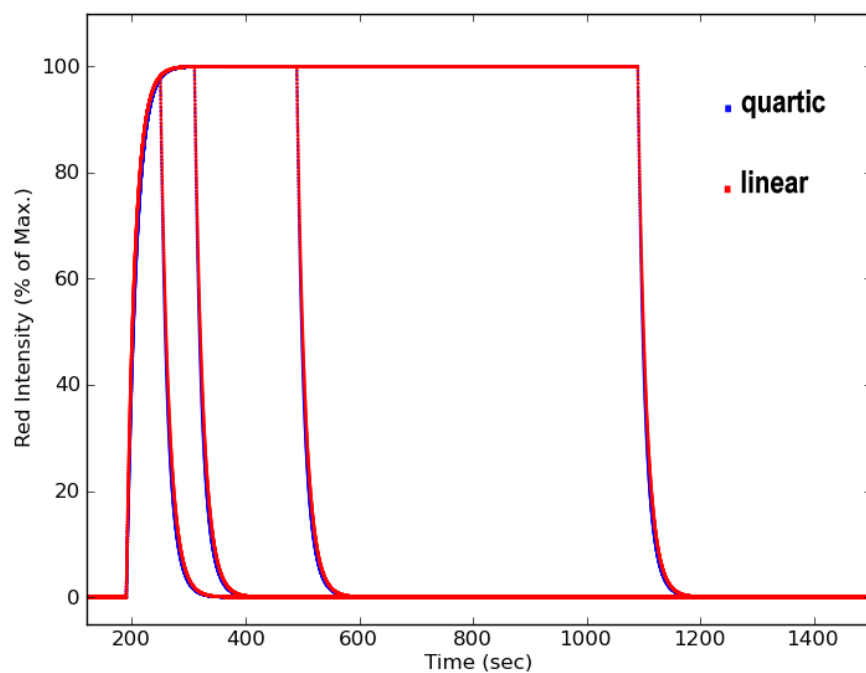

## Compound Data

### 1-benzylidene-2-phenylhydrazine (3a):

M. S. Gordon, S. A. Sojka and J. G. Krause, *J. Org. Chem.*, 1984, **49**, 97-100.

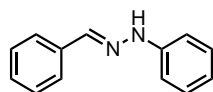

**<sup>1</sup>H NMR** (CDCl<sub>3</sub>, 400 MHz)  $\delta$  7.65-7.69 (m, 3H), 7.38 (t,  $J$  = 7.0 Hz, 2H), 7.34 - 7.24 (m, 3H), 7.11 - 7.15 (m, 2H), 6.89 (t,  $J$  = 7.5 Hz, 1H) ppm. **<sup>13</sup>C NMR** (CDCl<sub>3</sub>, 101 MHz)  $\delta$  144.7 (CH<sub>0</sub>), 137.3, 135.4 (CH<sub>0</sub>), 129.3, 128.6, 128.4, 126.2, 120.2, 112.8 ppm. **IR** (solid state): 3310 (w), 3058 (w), 1602 (m), 1594 (m), 1494 (m), 1262 (m) cm<sup>-1</sup>. **HRMS** (ES):  $m/z$  [MH]<sup>+</sup> calcd for C<sub>13</sub>H<sub>12</sub>N<sub>2</sub>: 196.0995, found 196.1000.

### 1-(4-methylbenzylidene)-2-phenylhydrazine (3b):

M. S. Gordon, S. A. Sojka and J. G. Krause, *J. Org. Chem.*, 1984, **49**, 97-100.

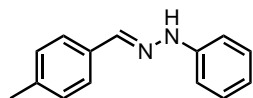

**<sup>1</sup>H NMR** (CDCl<sub>3</sub>, 400 MHz)  $\delta$  7.68 (s, 1H), 7.54-7.58 (m, 2H), 7.24-7.30 (m, 2H), 7.17-7.21 (m, 2H), 7.09-7.14 (m, 2H), 6.83-6.90 (m, 1H), 2.37 (s, 3H) ppm. **<sup>13</sup>C NMR** (CDCl<sub>3</sub>, 101 MHz)  $\delta$  144.9 (CH<sub>0</sub>), 138.5 (CH<sub>0</sub>), 137.6, 132.6 (CH<sub>0</sub>), 129.4, 129.3, 126.2, 120.0, 112.8, 21.4 (CH<sub>3</sub>) ppm. **IR** (solid state): 3312 (w), 3029 (w), 1597 (m), 1507 (m), 1493 (m), 1259 (m) cm<sup>-1</sup>. **HRMS** (ES):  $m/z$  [MH]<sup>+</sup> calcd for C<sub>14</sub>H<sub>14</sub>N<sub>2</sub>: 210.1151, found 210.1152.

### 1-(naphthalen-1-ylmethylene)-2-phenylhydrazine (3c):

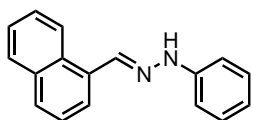

**<sup>1</sup>H NMR** (CDCl<sub>3</sub>, 400 MHz)  $\delta$  8.81 (d,  $J$  = 8.5 Hz, 1H), 8.26 (s, 1H), 7.81-7.92 (m, 3H), 7.74 (s, 1H), 7.60-7.64 (m, 1H), 7.48-7.56 (m, 2H), 7.32-7.37 (m, 2H), 7.18-7.22 (m, 2H), 6.94 (t,  $J$  = 7.0 Hz, 1H) ppm. **<sup>13</sup>C NMR** (CDCl<sub>3</sub>, 101 MHz)  $\delta$  144.7 (CH<sub>0</sub>), 137.0, 134.0 (CH<sub>0</sub>), 130.8 (CH<sub>0</sub>), 130.4 (CH<sub>0</sub>), 129.5, 129.1, 128.8, 126.8, 126.4, 126.0, 125.5, 124.5, 120.2, 112.9 ppm. **IR** (solid state): 3308 (w), 3053 (w), 1600 (s), 1506 (m), 1493 (m), 1253 (m) cm<sup>-1</sup>. **HRMS** (ES):  $m/z$  [MH]<sup>+</sup> calcd for C<sub>17</sub>H<sub>14</sub>N<sub>2</sub>: 246.1151, found 246.1147.

### 1-(4-(methylthio)benzylidene)-2-phenylhydrazine (3d):

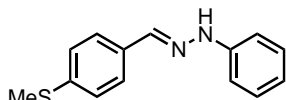

**<sup>1</sup>H NMR** (CDCl<sub>3</sub>, 400 MHz)  $\delta$  7.63-7.67 (s, 1H), 7.58-7.61 (m, 2H), 7.25-7.32 (m, 5H), 7.11-7.15 (m, 2H), 6.90 (t,  $J$  = 7.0 Hz, 1H), 2.53 (s, 3H) ppm. **<sup>13</sup>C NMR** (CDCl<sub>3</sub>, 101 MHz)  $\delta$  145.0 (CH<sub>0</sub>), 139.3 (CH<sub>0</sub>), 137.3, 133.7 (CH<sub>0</sub>), 129.2, 127.0, 126.9, 120.5, 16.1 (CH<sub>3</sub>) ppm. **IR** (solid state): 3315 (w), 1594 (m), 1493 (m), 1264 (m) cm<sup>-1</sup>. **Elemental Analysis** calcd for C<sub>14</sub>H<sub>14</sub>N<sub>2</sub>S: C = 69.39%, H = 5.82%, N = 11.56%, found C = 69.37%, H = 5.74%, N = 11.57%.



1-(4-ethoxybenzylidene)-2-phenylhydrazine (3e):

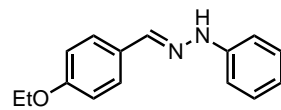 **<sup>1</sup>H NMR** (CDCl<sub>3</sub>, 400 MHz) δ 7.59-7.65 (m, 3H), 7.47 (s, 1H), 7.28-7.35 (m, 2H), 7.11-7.15 (m, 2H), 6.87-6.95 (m, 3H), 4.09 (q, *J* = 7.0 Hz, 2H), 1.46 (t, *J* = 7.0 Hz, 3H) ppm. **<sup>13</sup>C NMR** (CDCl<sub>3</sub>, 101 MHz) δ 159.5 (CH<sub>0</sub>), 145.1 (CH<sub>0</sub>), 137.6, 129.3, 128.0 (CH<sub>0</sub>), 127.6, 119.8, 114.8, 112.7, 63.6 (CH<sub>2</sub>), 14.9 (CH<sub>3</sub>) ppm. **IR** (solid state): 3315 (w), 2978 (w), 1597 (m), 1504 (m), 1494 (m), 1262 (m), 1239 (m) cm<sup>-1</sup>. **Elemental Analysis** calcd for C<sub>15</sub>H<sub>16</sub>N<sub>2</sub>O: C = 74.97%, H = 6.71%, N = 11.66%, found C = 74.77%, H = 6.70%, N = 11.28%.

1-(4-ethylbenzylidene)-2-phenylhydrazine (3f):

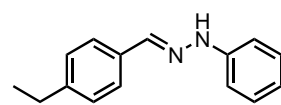 **<sup>1</sup>H NMR** (CDCl<sub>3</sub>, 400 MHz) δ 7.68 (s, 1H), 7.60-7.64 (m, 2H), 7.55 (s, 1H), 7.28-7.33 (m, 2H), 7.23-7.26 (m, 2H), 7.13-7.17 (m, 2H), 6.88-6.93 (m, 1H), 2.70 (q, *J* = 7.5 Hz, 2H), 1.29 (t, *J* = 7.5 Hz, 3H) ppm. **<sup>13</sup>C NMR** (CDCl<sub>3</sub>, 101 MHz) δ 144.9 (2C, CH<sub>0</sub>), 137.6, 132.9 (CH<sub>0</sub>), 129.3, 128.2, 126.3, 120.0, 112.8, 28.8 (CH<sub>2</sub>), 15.5 (CH<sub>3</sub>) ppm. **IR** (solid state): 3312 (w), 2966 (w), 1598 (m), 1507 (m), 1262 (m), 1258 (m) cm<sup>-1</sup>. **HRMS** (ES): *m/z* [MH]<sup>+</sup> calcd for C<sub>15</sub>H<sub>16</sub>N<sub>2</sub>: 224.1308, found 224.1307.

1-(2-fluorobenzylidene)-2-phenylhydrazine (3g):

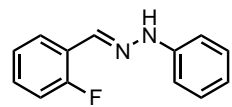 **<sup>1</sup>H NMR** (CDCl<sub>3</sub>, 400 MHz) δ 8.04-8.10 (m, 1H), 7.91 (s, 1H), 7.71 (s, 1H), 7.28-7.38 (m, 3H), 7.16-7.24 (m, 3H), 7.08-7.15 (m, 1H), 6.94-7.00 (m, 1H) ppm. **<sup>13</sup>C NMR** (CDCl<sub>3</sub>, 101 MHz) δ 160.5 (d, *J*<sub>C-F</sub> = 252 Hz), 144.5 (CH<sub>0</sub>), 130.6, 129.6 (d, *J*<sub>C-F</sub> = 8 Hz), 129.4, 126.2 (d, *J*<sub>C-F</sub> = 4 Hz), 124.4 (d, *J*<sub>C-F</sub> = 4 Hz), 123.2 (d, *J*<sub>C-F</sub> = 10 Hz, CH<sub>0</sub>), 120.5, 115.6, (d, *J*<sub>C-F</sub> = 30 Hz), 112.9 ppm. **IR** (solid state): 3309 (w), 3054 (w), 1598 (m), 1587 (m), 1482 (m), 1446 (m), 1256 (m), 1236 (m) cm<sup>-1</sup>. **Elemental Analysis** calcd for C<sub>13</sub>H<sub>11</sub>FN<sub>2</sub>: C = 72.88%, H = 5.18%, N = 13.08%, found C = 72.80%, H = 5.09%, N = 13.00%.

1-(4-methoxybenzylidene)-2-phenylhydrazine (3h):

M. S. Gordon, S. A. Sojka and J. G. Krause, *J. Org. Chem.*, 1984, **49**, 97-100.

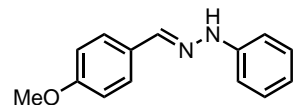 **<sup>1</sup>H NMR** (CDCl<sub>3</sub>, 400 MHz) δ 7.60-7.65 (m, 3H), 7.47 (s, 1H), 7.28-7.34 (m, 2H), 7.11-7.15 (m, 2H), 6.88-6.97 (m, 3H), 3.86 (s, 3H) ppm. **<sup>13</sup>C NMR** (CDCl<sub>3</sub>, 101 MHz) δ 160.1 (CH<sub>0</sub>), 145.0 (CH<sub>0</sub>), 137.5, 129.3, 128.2 (CH<sub>0</sub>), 127.7, 119.8, 114.2, 112.7, 55.3 (CH<sub>3</sub>) ppm. **IR** (solid state): 3309 (w), 3054 (w), 1598 (m), 1587 (m), 1482 (m), 1446 (m), 1256 (m), 1236 (m) cm<sup>-1</sup>. **Elemental Analysis** calcd for C<sub>14</sub>H<sub>14</sub>N<sub>2</sub>O: C = 74.31%, H = 6.24%, N = 12.38%, found C = 74.39%, H = 6.23%, N = 12.44%.

### 1-(2-chlorobenzylidene)-2-phenylhydrazine (3i):

R. Liu, Y. Zhu, L. Qin and S. Ji, *Synthetic Communications*, 2008, **38**, 249-254.

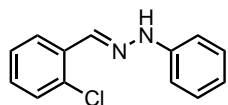

**<sup>1</sup>H NMR** (CDCl<sub>3</sub>, 400 MHz) δ 8.08-8.14, (m, 2H), 7.82 (s, 1H), 7.23-7.42 (m, 5H), 7.15-7.19 (m, 2H), 6.93-6.98 (m, 1H) ppm. **<sup>13</sup>C NMR** (CDCl<sub>3</sub>, 101 MHz) δ 144.4 (CH<sub>0</sub>), 133.6, 132.8 (CH<sub>0</sub>), 132.6 (CH<sub>0</sub>), 129.7, 129.4, 129.2, 127.0, 126.7, 120.5, 112.9 ppm. **IR** (solid state): 3313 (w), 3057 (w), 1603 (m), 1580 (m), 1493 (m), 1442 (m), 1257 (m) cm<sup>-1</sup>. **Elemental Analysis** calcd for C<sub>13</sub>H<sub>11</sub>ClN<sub>2</sub>: C = 67.68%, H = 4.81%, N = 12.14%, found C = 67.67%, H = 4.78%, N = 12.14%.

### E-(3-phenyloxiran-2-yl)methanol (6a):

K. Oh and W. E. Knabe, *Tetrahedron*, 2009, **65**, 2966-2974.

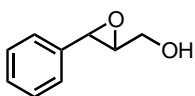

**<sup>1</sup>H NMR** (CDCl<sub>3</sub>, 400 MHz) δ 7.30-7.40 (m, 5H), 7.47 (s, 1H), 4.07 (dd, *J* = 12.5, 2.5 Hz, 1H), 3.95 (d, *J* = 2.0 Hz, 1H), 3.70 (dd, *J* = 12.5, 4.0 Hz, 1H), 3.25 (dt, *J* = 4.0, 2.5 Hz, 1H) ppm. **<sup>13</sup>C NMR** (CDCl<sub>3</sub>, 101 MHz) δ 136.7 (CH<sub>0</sub>), 128.6, 128.4, 125.8, 62.5, 61.3 (CH<sub>2</sub>), 55.63 ppm. **IR** (solid state): 3408 (br), 2924 (w), 1496 (m), 1461 (m), 1069 (m) cm<sup>-1</sup>. **HRMS** (ES): *m/z* [MNa]<sup>+</sup> calcd for C<sub>9</sub>H<sub>10</sub>NaO: 173.0573, found 173.0575.

### E-(3-pentyloxiran-2-yl)methanol (6b):

A. Mordini, S. Bindi, S. Pecchi, A. Degl'Innocenti, G. Reginato and A. Serici, *J. Org. Chem.*, 1996, **61**, 4374-4378.

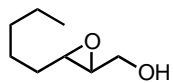

**<sup>1</sup>H NMR** (CDCl<sub>3</sub>, 400 MHz) δ 3.91 (dd, *J* = 12.5, 2.5 Hz, 1H), 3.63 (dd, *J* = 12.5, 4.5 Hz, 1H), 2.89-3.00 (m, 2H), 2.06 (br, 1H), 1.54-1.63 (m, 2H), 1.39-1.52 (m, 2H), 1.33 (m, 4H), 0.86-0.95 (m, 3H) ppm. **<sup>13</sup>C NMR** (CDCl<sub>3</sub>, 101 MHz) δ 61.8, 58.5 (CH<sub>1</sub>), 56.1 (CH<sub>1</sub>), 31.6, 31.5, 25.6, 22.6, 14.0 (CH<sub>3</sub>) ppm. **IR** (solid state): 3415 (br), 2926 (w), 2860 (w), 1467 (m), 1081 (m) cm<sup>-1</sup>. **Elemental Analysis** calcd for C<sub>8</sub>H<sub>16</sub>O<sub>2</sub>: C = 66.63%, H = 11.18%, found C = 66.60%, H = 10.94%.

### E-(2-methyl-3-phenyloxiran-2-yl)methanol (6c):

R. Balamurugan, R. B. Kothapalli and G. K. Thota, *European Journal of Organic Chemistry*, 2011, 1557-1569.

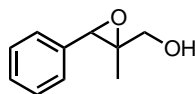

**<sup>1</sup>H NMR** (CDCl<sub>3</sub>, 400 MHz) δ 7.18-7.47 (m, 5H), 4.24 (s, 1H), 3.88 (d, *J* = 12.5 Hz, 1H), 3.78 (d, *J* = 12.5 Hz, 1H), 1.12 (s, 3H) ppm. **<sup>13</sup>C NMR** (CDCl<sub>3</sub>, 101 MHz) δ 135.6 (CH<sub>0</sub>), 128.15, 127.6, 126.5, 65.1 (CH<sub>0</sub>), 63.8, 60.3, 13.5 ppm. **IR** (solid state): 3428 (br), 2927 (w), 1497 (w), 1450 (m), 1384 (w), 1070 (m), 1030 (m) cm<sup>-1</sup>. **Elemental Analysis** calcd for C<sub>10</sub>H<sub>12</sub>O<sub>2</sub>: C = 73.15%, H = 7.37%, found C = 72.39%, H = 7.30%.

### E-(3-octyloxiran-2-yl)methanol (6d):

J. S. Yadav, P. K. Deshpande and G. V. M. Sharma, *Tetrahedron*, 1990, **46**, 7033-7046.

J. K. Karjalainen, O. E. O. Hormi and D. C. Sherrington, *Tetrahedron-Asymmetry*, 1998, **9**, 1563-1575.

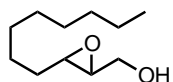

<sup>1</sup>H NMR (CDCl<sub>3</sub>, 400 MHz) δ 3.93 (dd, *J* = 12.5, 2.5 Hz, 1H), 3.64 (dd, *J* = 12.5, 4.5 Hz, 1H), 2.89-3.02 (m, 2H), 1.54-1.65 (m, 2H), 1.40-1.51 (m, 2H), 1.17-1.38 (m, 10H), 0.84-0.94 (m, 3H), 1.71-1.99 (m, 1H) ppm. <sup>13</sup>C NMR (CDCl<sub>3</sub>, 101 MHz) δ 61.8, 58.5 (CH<sub>1</sub>), 56.0 (CH<sub>1</sub>), 31.9, 31.6, 29.5, 29.4, 29.2, 26.0, 22.7, 14.1 (CH<sub>3</sub>) ppm. IR (solid state): 3264 (br), 3138 (br), 2918 (s), 2848 (s), 1459 (m), 1333 (w), 1058 (m), 1017 (m) cm<sup>-1</sup>. **Elemental Analysis** calcd for C<sub>11</sub>H<sub>22</sub>O<sub>2</sub>: C = 70.92%, H = 11.90% found C = 70.89%, H = 11.82.

### 2-phenyl-1,3-dithiane (9a):

C.-T. Chen, Y.-D. Lin and C.-Y. Liu, *Tetrahedron*, 2009, **65**, 10470-10476.

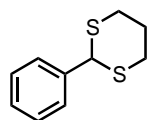

<sup>1</sup>H NMR (CDCl<sub>3</sub>, 400 MHz) δ 7.45-7.55 (m, 2H), 7.27-7.41 (m, 3H), 5.20 (s, 1H), 3.03-3.16 (m, 2H), 2.93 (m, 2H), 2.14-2.24 (m, 1H), 1.90-2.03 (m, 1H) ppm. <sup>13</sup>C NMR (CDCl<sub>3</sub>, 101 MHz) δ 139.2 (CH<sub>0</sub>), 128.8, 128.5, 127.8, 51.5, 32.2 (CH<sub>2</sub>), 25.2 (CH<sub>2</sub>) ppm. IR (solid state): 2949 (w), 2892 (m), 1451 (m), 1275 (m), 1171 (w) cm<sup>-1</sup>. **Elemental Analysis** calcd for C<sub>10</sub>H<sub>12</sub>S<sub>2</sub>: C = 61.18%, H = 6.16% found C = 60.45%, H = 6.09%.

### 2-(p-tolyl)-1,3-dithiane (9b):

D. Dong, Y. Ouyang, H. Yu, Q. Liu, J. Liu, M. Wang and J. Zhu, *J. Org. Chem.*, 2005, **70**, 4535-4537

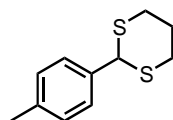

<sup>1</sup>H NMR (CDCl<sub>3</sub>, 400 MHz) δ 7.33-7.50 (m, 2H), 7.11-7.24 (m, 2H), 5.15 (s, 1H), 3.00-3.19 (m, 2H), 2.82-2.99 (m, 2H), 2.28-2.47 (s, 3H), 2.13-2.27 (m, 1H), 1.85-2.07 (m, 1H) ppm. <sup>13</sup>C NMR (CDCl<sub>3</sub>, 101 MHz) δ 138.3 (CH<sub>0</sub>), 136.3 (CH<sub>0</sub>), 129.5, 127.7, 51.3 (CH<sub>1</sub>), 32.2, 25.2, 21.2 (CH<sub>3</sub>) ppm. IR (solid state): 2932 (w), 2894 (m), 1513 (m), 1421 (m), 1277 (m), 1169 (w) cm<sup>-1</sup>. **Elemental Analysis** calcd for C<sub>11</sub>H<sub>14</sub>S<sub>2</sub>: C = 62.81%, H = 6.71% found C = 62.92%, H = 6.70%.

### 2-(2-fluorophenyl)-1,3-dithiane (9c):

S. Goswami and A. C. Maly, *Tetrahedron Lett.*, 2008, **49**, 3092-3096.

P. C. B. Page, A. E. Graham and B. K. Park, *Tetrahedron*, 1992, **48**, 7265-7274.

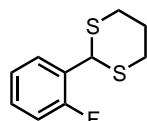

<sup>1</sup>H NMR (CDCl<sub>3</sub>, 400 MHz) δ 7.53-7.73 (m, 1H), 7.22-7.36 (m, 1H), 7.13-7.20 (m, 1H), 6.99-7.12 (m, 1H), 5.57 (s, 1H), 3.09-3.26 (m, 2H), 2.88-2.99 (m, 2H), 2.14-2.25 (m, 1H), 1.89-2.03 (m, 1H) ppm. <sup>13</sup>C NMR (CDCl<sub>3</sub>, 101 MHz) δ 159.0 (d, *J*<sub>C-F</sub> = 249 Hz), 130.0 (d, *J*<sub>C-F</sub> = 8 Hz), 129.6 (d, *J*<sub>C-F</sub> = 3 Hz), 126.3 (d, *J*<sub>C-F</sub> = 14 Hz), 124.7 (d, *J*<sub>C-F</sub> = 4 Hz), 115.5 (d, *J*<sub>C-F</sub> = 22 Hz), 43.1, 32.3, 25.1 ppm. IR (solid state): 2897(w), 1586 (m), 1456 (m), 1421 (m), 1275 (m), 1231 (m), 1088 (m) cm<sup>-1</sup>. **Elemental Analysis** calcd for C<sub>10</sub>H<sub>11</sub>FS<sub>2</sub>: C = 56.04%, H = 5.17% found C = 56.16%, H = 5.17%.
